# Supplementary material for: Exploring the support environment for people following anterior cruciate ligament injury in Aotearoa New Zealand
Source: Research Square preprint supplement (doi:10.21203/rs.3.rs-8370277/v1), 2026-01-20
Supplement: Supplementary file 1 [file 6ed8e68ca4aba0e28da439fd.docx]

**Additional file 1**

**Interview Questions**

*For reference:*

*Research Question:*

*What are stakeholder perceptions and experiences of working with people with PTOA in the medium to long-term in AoNZ following ACL injury?*

*Aim:*

*To gain insight into stakeholder perceptions and experiences of the medium and long-term impact of PTOA on the well-being of people living in AoNZ following an ACL injury.*

**Introduction**

The researcher(s) introduction and whanaungatanga (building a relationship) - provide a little information about the project, purpose and goals, and the researcher(s).

**A bit about you**

I (we) would like to know a bit about you; can you tell me about:

- Your job
- The organization that you work for
- The role you have regarding people with PTOA following ACL injury
- Your background that led to your involvement in this role

**PTOA following ACL injury**

- Is your organisation aware of the impact and long-term consequences of ACL injury? For the individuals concerned? For your organisation?
- Do you have some ideas of how these consequences might be mitigated?
- How do you perceive the experience of people with PTOA following ACL Injury, in relation to physical health, mental health, social interactions, sport participation etc.?
- How do you perceive individual’s interactions with your organisation?
- Do you believe that these people access / receive adequate management for their condition? After their initial injury? At later timepoints?
- What are the barriers / facilitators to management for people with PTOA following ACL injury that you/your organisation recognise?
- What do you think your organisation does well to help people with PTOA following ACL injury?
- What could be done to address any barriers to management?
- What are your organisations views on acceptable boundaries for an intervention / duty of care in relation to cost, timescales etc.?
- Do you have any comments specifically relating to Māori and Pacific peoples with PTOA? E.g. proportion of your organisation’s interactions, outcomes, access to care etc.
- What would successful medium to long-term management of PTOA following knee injury look like?
- Is there anything else you thought we would ask about or would like to say about PTOA following ACL injury?
